# Supplementary material
Source: publisher figshare collection journal article supplement (https://tandf.figshare.com/ndownloader/files/12801290)
Supplement: Supplementary file 1 [file 12801290]

**Supplementary Material**

**Supplementary Material 1: Survey**

1. Who do you work for?

City Council Another care provider

1. What is your job title? _____________________________________
2. How long have you worked with people with learning disabilities?

Less than 1 year.........................

1-3 years...................................

4-6 years...................................

6-9 years...................................

9 years or more.........................

1. Have you had Intensive Interaction training?

Yes.............................................

No.............................................

1. When did you have Intensive Interaction Training

Less than 1 year ago...................

1-2 years ago.............................

2-3 years ago.............................

3-4 years ago.............................

Over 4 years ago........................

1. If yes, please say what level of training you have had?

One Day Awareness...................

Advanced practitioner...............

Co-ordinator..............................

1. Do you use Intensive Interaction at work?

Yes ...........................................

No.............................................

1. Please read the following statements about Intensive Interaction and tick the box that best matches your opinion

| Statement  Intensive Interaction... | Agree strongly | Agree slightly | Neither agree or disagree | Disagree slightly | Disagree strongly |
| --- | --- | --- | --- | --- | --- |
| ...helps me get to know the people I support (the service users) |  |  |  |  |  |
| ...is a positive experience for me |  |  |  |  |  |
| ...is a positive experience for the person I support |  |  |  |  |  |
| ...is hard to do |  |  |  |  |  |
| ...helps people I support to communicate |  |  |  |  |  |
| ...takes up too much time |  |  |  |  |  |
| ...has lots of paperwork |  |  |  |  |  |
| ...is something you need training to do |  |  |  |  |  |
| ...needs lots of specialist equipment |  |  |  |  |  |
| ...is something a lot of people use where I work |  |  |  |  |  |
| ...makes me feel self conscious |  |  |  |  |  |
| ...is something I’d like to be able to use with more people. |  |  |  |  |  |
| ....is an important part of my job |  |  |  |  |  |

1. Would you like to be able to do Intensive Interaction...?

More Often the same as I do now Less Often

1. If you are not using Intensive Interaction or would like to use it more what do you feel stops you from using Intensive interaction at work?

(Please choose your top 3 reasons. Place the number 1, 2 or 3 in the box next to your choice with 1 being the most important)

I am worried about doing it wrong..................................................

Negative feeling about Intensive Interaction from colleagues.........

Negative feeling about Intensive Interaction from managers..........

I don’t have enough time................................................................

I don’t have the right equipment....................................................

There is not enough staff................................................................

The environment where I work is too busy.....................................

I have not had the training.............................................................

If you would like to make any further comments please do so in the box provided-

**Supplementary Material 2: Interview Guide**

1. What do you think Intensive Interaction is?
   1. What is your experience of using Intensive Interaction?
   2. Where do you use it?
   3. How long have you used it for?
2. What is the difference between talking to someone and using Intensive Interaction?
3. Is Intensive Interaction important?
4. Do you think there are benefits of using Intensive Interaction in your everyday work?
   1. Are there benefits for the people you support
      1. What are they? Do you see changes? Are they gradual or sudden changes? Are they changes you’ve only seen in Intensive Interaction sessions or are they wider than this?
   2. Are there benefits for you as staff in your everyday work? What are they?
      1. Does it help you get to know the people you support? How – in what ways? How does that help?
      2. Does it allow you to spend more time with the person?
   3. Do you think families and carers see benefits?
      1. Does it enable/improve links with family cares?
   4. Are there benefits for the organisation?
      1. Does it affect the quality of the service overall or how it is seen by other people?
      2. Are there other benefits to the wider service
5. Are there any barriers are to using Intensive Interaction in your everyday work?
   1. For the people you support
   2. On an individual level?
      1. What is your personal perspective on Intensive Interaction? How do you feel about doing Intensive Interaction?
   3. Are there barriers to delivering Intensive Interaction that come from needing to work as part of a staff team?
      1. Practical
      2. Attitudes of other staff to Intensive Interaction
   4. At a service level? Are there things the service does or doesn’t do that get in the way of delivering Intensive Interaction?
      1. Practical
      2. Attitude of service or service managers to Intensive Interaction
6. Has using Intensive Interaction changed your approach to your everyday work?
   1. If yes, how?
      1. With individuals you support?
      2. In group work?
      3. In other parts of your role?
   2. Has it changed the way you perceive the people you support?
   3. Do you think Intensive Interaction changed the way others in the service work? If so how and why?
7. How are you supported to use Intensive Interaction in your everyday work?
   1. Within staff team
   2. Any outside support
8. What do you think is the key factor to keeping intensive Interaction going?
